# Supplementary material for: Laurentthomasite, Mg&lt;sub&gt;2&lt;/sub&gt;K(Be&lt;sub&gt;2&lt;/sub&gt;Al)Si&lt;sub&gt;12&lt;/sub&gt;O&lt;sub&gt;30&lt;/sub&gt;: a new milarite-group-type member from the Ihorombe region, Fianarantsoa Province, Madagascar
Source: Copernicus journal article supplement (doi:10.5194/ejm-32-355-2020), 2020-06-17
Supplement: Supplementary file 1 [file ejm-32-355-2020-supplement.zip]

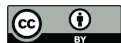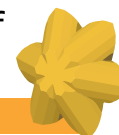

*Supplement of*

**Laurentthomasite,  $\text{Mg}_2\text{K}(\text{Be}_2\text{Al})\text{Si}_{12}\text{O}_{30}$ : a new milarite-group-type member from the Ihorombe region, Fianarantsoa Province, Madagascar**

Cristiano Ferraris et al.

*Correspondence to:* Cristiano Ferraris ([ferraris@mnhn.fr](mailto:ferraris@mnhn.fr))

- [ejm-32-355-2020-supplement-title-page.pdf](#)
- [laurentthomasite.cif](#)

The copyright of individual parts of the supplement might differ from the CC BY 4.0 License.
